# Supplementary material for: One-step real-time RT-PCR assays for serotyping dengue virus in clinical samples
Source: PubMed Central journal article supplement (PMC4630907; doi:10.1186/s12879-015-1226-z), 2015-11-02

**A**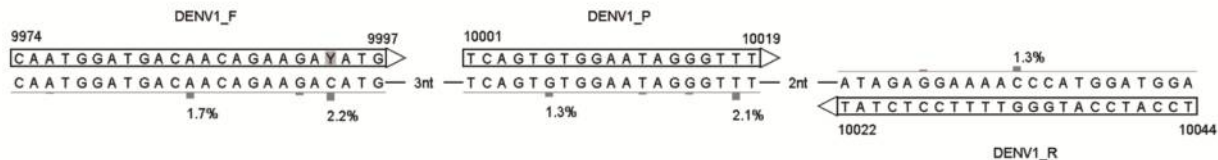**B**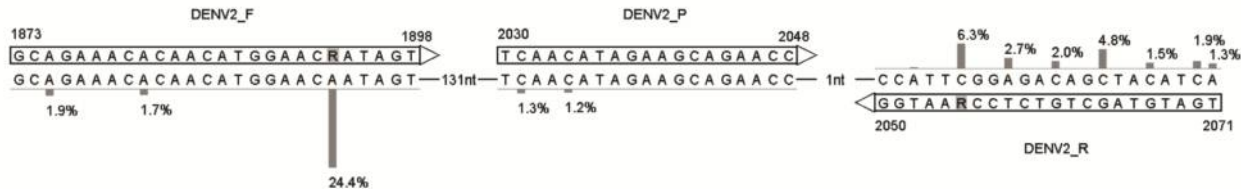**C**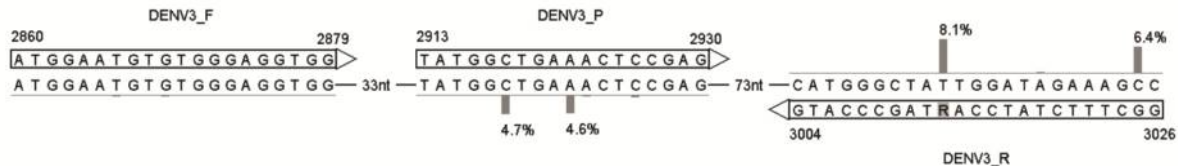**D**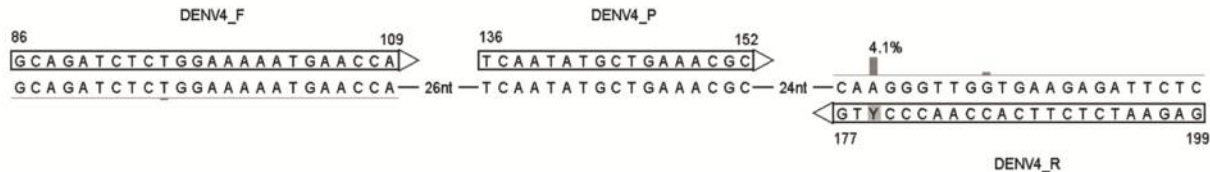

Supplement: 12879_2015_1226_MOESM1_ESM.pdf [file 12879_2015_1226_MOESM1_ESM.pdf]
