# Supplementary material for: One-step real-time RT-PCR assays for serotyping dengue virus in clinical samples
Source: PubMed Central journal article supplement (PMC4630907; doi:10.1186/s12879-015-1226-z), 2015-11-02
Supplement: 12879_2015_1226_MOESM3_ESM.pdf [file 12879_2015_1226_MOESM3_ESM.pdf]

### Additional file 3. Cq-value comparison between the test methods and reference method

| Sample nr. | Days after symptom onset* | DENV1       | CDC DENV-1       | DENV2       | CDC DENV-2       | DENV3       | CDC DENV-3       | DENV4       | CDC DENV-4       |
|------------|---------------------------|-------------|------------------|-------------|------------------|-------------|------------------|-------------|------------------|
|            |                           | Test method | Reference method | Test method | Reference method | Test method | Reference method | Test method | Reference method |
| 1          | 4                         | nd          | nd               | nd          | nd               | nd          | nd               | 26.8        | 27.8             |
| 2          | 6                         | 30.2        | 32.6             | nd          | nd               | nd          | nd               | nd          | nd               |
| 3          | 5                         | 30.0        | 31.6             | nd          | nd               | nd          | nd               | nd          | nd               |
| 4          | 6                         | 33.9        | 38.7             | nd          | nd               | nd          | nd               | nd          | nd               |
| 5          | 7                         | nd          | nd               | 37.2        | nd               | nd          | nd               | nd          | nd               |
| 6          | 3                         | 18.9        | 21.2             | nd          | nd               | nd          | nd               | nd          | nd               |
| 7          | 6                         | nd          | nd               | 34.9        | nd               | nd          | nd               | nd          | nd               |
| 8          | 5                         | 30.1        | 35.6             | nd          | nd               | nd          | nd               | nd          | nd               |
| 9          | 9                         | nd          | nd               | nd          | nd               | nd          | nd               | nd          | nd               |
| 10         | 4                         | 21.5        | 22.0             | nd          | nd               | nd          | nd               | nd          | nd               |
| 11         | 5                         | nd          | nd               | nd          | nd               | nd          | nd               | 30.0        | 30.7             |
| 12         | 9                         | 28.5        | 32.9             | nd          | nd               | nd          | nd               | nd          | nd               |
| 13         | 6                         | 30.7        | 34.1             | nd          | nd               | nd          | nd               | nd          | nd               |
| 14         | 5                         | nd          | nd               | 33.4        | 38.0             | nd          | nd               | nd          | nd               |
| 15         | 3                         | 26.9        | 29.9             | nd          | nd               | nd          | nd               | nd          | nd               |
| 16         | 8                         | nd          | nd               | nd          | nd               | nd          | nd               | nd          | nd               |
| 17         | 7                         | 32.7        | 38.6             | nd          | nd               | nd          | nd               | nd          | nd               |
| 18         | 8                         | 34.7        | 37.6             | nd          | nd               | nd          | nd               | nd          | nd               |
| 19         | 4                         | nd          | nd               | nd          | nd               | 31.7        | 37.1             | nd          | nd               |
| 20         | 5                         | 30.2        | 34.5             | nd          | nd               | nd          | nd               | nd          | nd               |
| 21         | 4                         | 22.7        | 24.0             | nd          | nd               | nd          | nd               | nd          | nd               |
| 22         | 6                         | 29.7        | 36.8             | nd          | nd               | nd          | nd               | nd          | nd               |
| 23         | 7                         | nd          | nd               | nd          | nd               | 36.0        | nd               | nd          | nd               |
| 24         | 7                         | nd          | nd               | 33.3        | 34.6             | nd          | nd               | nd          | nd               |
| 25         | 8                         | 34.4        | 37.1             | nd          | nd               | nd          | nd               | nd          | nd               |
| 26         | 7                         | 30.2        | 33.1             | nd          | nd               | nd          | nd               | nd          | nd               |
| 27         | 4                         | 22.9        | 26.7             | nd          | nd               | nd          | nd               | nd          | nd               |
| 28         | 6                         | 29.7        | 35.0             | nd          | nd               | nd          | nd               | nd          | nd               |
| 29         | 4                         | 23.3        | 26.9             | nd          | nd               | nd          | nd               | nd          | nd               |
| 30         | 6                         | 29.0        | 32.3             | nd          | nd               | nd          | nd               | nd          | nd               |
| 31         | 7                         | nd          | nd               | nd          | nd               | 31.9        | 31.9             | nd          | nd               |
| 32         | 4                         | 21.3        | 21.0             | nd          | nd               | nd          | nd               | nd          | nd               |
| 33         | 4                         | nd          | nd               | nd          | nd               | 21.0        | 28.0             | nd          | nd               |
| 34         | 9                         | 26.9        | 29.6             | nd          | nd               | nd          | nd               | nd          | nd               |
| 35         | 4                         | nd          | nd               | 31.9        | 32.4             | nd          | nd               | nd          | nd               |
| 36         | 6                         | nd          | nd               | 26.6        | 28.2             | nd          | nd               | nd          | nd               |
| 37         | 3                         | nd          | nd               | nd          | nd               | 33.0        | 28.4             | nd          | nd               |
| 38         | 5                         | 24.2        | 30.8             | nd          | nd               | nd          | nd               | nd          | nd               |
| 39         | 8                         | 35          | 36.2             | nd          | nd               | nd          | nd               | nd          | nd               |
| 40         | 3                         | nd          | nd               | nd          | nd               | 17.5        | 20.0             | nd          | nd               |
| 41         | 7                         | 28.4        | 32.3             | nd          | nd               | nd          | nd               | nd          | nd               |
| 42         | 1                         | nd          | nd               | 11.4        | 17.9             | nd          | nd               | nd          | nd               |
| 43         | 4                         | 33.9        | 37.0             | nd          | nd               | nd          | nd               | nd          | nd               |
| 44         | 7                         | 38.3        | nd               | nd          | nd               | nd          | nd               | nd          | nd               |
| 45         | 6                         | 34.4        | 39.3             | nd          | nd               | nd          | nd               | nd          | nd               |
| 46         | 2                         | 16.8        | 19.5             | nd          | nd               | nd          | nd               | nd          | nd               |
| 47         | 3                         | nd          | nd               | nd          | nd               | 17.8        | 16.0             | nd          | nd               |
| 48         | n/a                       | 31.7        | 32.2             | nd          | nd               | nd          | nd               | nd          | nd               |
| 49         | 8                         | 33.9        | 34.3             | nd          | nd               | nd          | nd               | nd          | nd               |
| 50         | n/a                       | 29.3        | 36.6             | nd          | nd               | nd          | nd               | nd          | nd               |
| 51         | 3                         | nd          | nd               | nd          | nd               | 23.1        | 24.3             | nd          | nd               |
| 52         | 3                         | 19.5        | 22.2             | nd          | nd               | nd          | nd               | nd          | nd               |
| 53         | n/a                       | nd          | nd               | nd          | nd               | nd          | nd               | 28.4        | 30.0             |
| 54         | 5                         | nd          | nd               | 31.9        | 36.9             | nd          | nd               | nd          | nd               |
| 55         | n/a                       | nd          | nd               | 24.9        | 28.4             | nd          | nd               | nd          | nd               |

|    |     |      |      |      |      |      |      |      |      |
|----|-----|------|------|------|------|------|------|------|------|
| 56 | 5   | nd   | nd   | nd   | nd   | nd   | nd   | 25.9 | 25.9 |
| 57 | 4   | nd   | nd   | 37.9 | nd   | nd   | nd   | nd   | nd   |
| 58 | n/a | 29.8 | 34.0 | nd   | nd   | nd   | nd   | nd   | nd   |
| 59 | 5   | 32.6 | 36.6 | nd   | nd   | nd   | nd   | nd   | nd   |
| 60 | 1   | nd   | nd   | nd   | nd   | nd   | nd   | 25.0 | 26.8 |
| 61 | 5   | nd   | nd   | nd   | nd   | nd   | nd   | 30.5 | 39.1 |
| 62 | n/a | 24.7 | 26.1 | nd   | nd   | nd   | nd   | nd   | nd   |
| 63 | n/a | 23.3 | 26.2 | nd   | nd   | nd   | nd   | nd   | nd   |
| 64 | 4   | nd   | nd   | 24.8 | 23.3 | nd   | nd   | nd   | nd   |
| 65 | 6   | 28.4 | 32.7 | nd   | nd   | nd   | nd   | nd   | nd   |
| 66 | 4   | 22.3 | 25.4 | nd   | nd   | nd   | nd   | nd   | nd   |
| 67 | 3   | 18.9 | 22.3 | nd   | nd   | nd   | nd   | nd   | nd   |
| 68 | 6   | nd   | nd   | nd   | nd   | nd   | nd   | 28.5 | 29.8 |
| 69 | 1   | nd   | nd   | 20.0 | 30.8 | nd   | nd   | nd   | nd   |
| 70 | 4   | 28.7 | 31.7 | nd   | nd   | nd   | nd   | nd   | nd   |
| 71 | 5   | 31.2 | 34.2 | nd   | nd   | nd   | nd   | nd   | nd   |
| 72 | 3   | nd   | nd   | 21.4 | 25.7 | nd   | nd   | nd   | nd   |
| 73 | 6   | nd   | nd   | 36.1 | nd   | nd   | nd   | nd   | nd   |
| 74 | n/a | 24.0 | 25.1 | nd   | nd   | nd   | nd   | nd   | nd   |
| 75 | 5   | 33.7 | 36.9 | nd   | nd   | nd   | nd   | nd   | nd   |
| 76 | n/a | 17.2 | 20.2 | nd   | nd   | nd   | nd   | nd   | nd   |
| 77 | n/a | nd   | nd   | 31.3 | 36.8 | nd   | nd   | nd   | nd   |
| 78 | 9   | nd   | nd   | 34.8 | 39.4 | nd   | nd   | nd   | nd   |
| 79 | 2   | nd   | nd   | nd   | nd   | 15.0 | 16.1 | nd   | nd   |
| 80 | n/a | 26.9 | 30.2 | nd   | nd   | nd   | nd   | nd   | nd   |
| 81 | n/a | 25.0 | 25.4 | nd   | nd   | nd   | nd   | nd   | nd   |
| 82 | n/a | nd   | nd   | 15.1 | 19.6 | nd   | nd   | nd   | nd   |
| 83 | 5   | 28.5 | 29.4 | nd   | nd   | nd   | nd   | nd   | nd   |
| 84 | 5   | 26.7 | 29.1 | nd   | nd   | nd   | nd   | nd   | nd   |
| 85 | 1   | nd   | nd   | 14.9 | 20.1 | nd   | nd   | nd   | nd   |

Grey boxes represent samples that tested positive in the individual assays: for the DENV1, DENV2, DENV3, DENV4 assays samples with a Cq value < 40 and for the CDC DENV-1-4 assays Cq value < 37 (according to the manufacturer's instructions). Orange boxes represent samples that were classified as negative in the CDC DENV-1-4 assays but had Cq values < 40. Red boxes represent samples which tested positive in the DENV1, DENV2, DENV3, or the DENV4 assay but for which no amplification was recorded in the CDC DENV-1-4 assays.

nd = not detected  
n/a = not available
